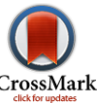

# Human Astrocytes: Secretome Profiles of Cytokines and Chemokines

Sung S. Choi<sup>1,9</sup>, Hong J. Lee<sup>1,9</sup>, Inja Lim<sup>2</sup>, Jun-ichi Satoh<sup>3</sup>, Seung U. Kim<sup>1,4\*</sup>

**1** Medical Research Institute, Chung-Ang University College of Medicine, Seoul, Korea, **2** Department of Physiology, Chung-Ang University College of Medicine, Seoul, Korea, **3** Department of Bioinformatics and Molecular Neuropathology, Meiji Pharmaceutical University, Kiyose, Japan, **4** Division of Neurology, Department of Medicine, UBC Hospital, University of British Columbia, Vancouver, Canada

## Abstract

Astrocytes play a key role in maintenance of neuronal functions in the central nervous system by producing various cytokines, chemokines, and growth factors, which act as a molecular coordinator of neuron-glia communication. At the site of neuroinflammation, astrocyte-derived cytokines and chemokines play both neuroprotective and neurotoxic roles in brain lesions of human neurological diseases. At present, the comprehensive profile of human astrocyte-derived cytokines and chemokines during inflammation remains to be fully characterized. We investigated the cytokine secretome profile of highly purified human astrocytes by using a protein microarray. Non-stimulated human astrocytes in culture expressed eight cytokines, including G-CSF, GM-CSF, GRO $\alpha$  (CXCL1), IL-6, IL-8 (CXCL8), MCP-1 (CCL2), MIF and Serpin E1. Following stimulation with IL-1 $\beta$  and TNF- $\alpha$ , activated astrocytes newly produced IL-1 $\beta$ , IL-1ra, TNF- $\alpha$ , IP-10 (CXCL10), MIP-1 $\alpha$  (CCL3) and RANTES (CCL5), in addition to the induction of sICAM-1 and complement component 5. Database search indicated that most of cytokines and chemokines produced by non-stimulated and activated astrocytes are direct targets of the transcription factor NF- $\kappa$ B. These results indicated that cultured human astrocytes express a distinct set of NF- $\kappa$ B-target cytokines and chemokines in resting and activated conditions, suggesting that the NF- $\kappa$ B signaling pathway differentially regulates gene expression of cytokines and chemokines in human astrocytes under physiological and inflammatory conditions.

**Citation:** Choi SS, Lee HJ, Lim I, Satoh J-i, Kim SU (2014) Human Astrocytes: Secretome Profiles of Cytokines and Chemokines. PLoS ONE 9(4): e92325. doi:10.1371/journal.pone.0092325

**Editor:** Cesar V. Borlongan, University of South Florida, United States of America

**Received:** November 26, 2013; **Accepted:** February 20, 2014; **Published:** April 1, 2014

**Copyright:** © 2014 Choi et al. This is an open-access article distributed under the terms of the Creative Commons Attribution License, which permits unrestricted use, distribution, and reproduction in any medium, provided the original author and source are credited.

**Funding:** The present study was supported by the Korea Healthcare Technology R&D Project HI12C0167 (A120214) and Canadian Myelin Research Initiative. The funders had no role in study design, data collection and analysis, decision to publish, or preparation of the manuscript.

**Competing Interests:** The authors have declared that no competing interests exist.

\* E-mail: sukim@mail.ubc.ca

<sup>9</sup> These authors contributed equally to the work.

## Introduction

Astrocytes belong to one of three major types of neuroglia in the central nervous system (CNS) and play active roles in many neuronal functions: maintaining ion and pH homeostasis, promoting the synthesis and removal of neurotransmitters, providing glucose supply and antioxidant defense, and regulating synaptic activity by producing various cytokines, chemokines, growth factors, and metabolites, all of which act as a molecular coordinator of neuron-glia communication [1]. At the site of neuroinflammation, astrocyte-derived cytokines and chemokines play both neurotoxic (inflammatory) and neuroprotective (immunoregulatory) roles in the brains of human neurological diseases, such as multiple sclerosis (MS), Alzheimer's disease (AD), Parkinson's disease (PD), and HIV-1 associated dementia (HAD) [2]. However, at present, the exact profile of human astrocyte-derived cytokines and chemokines during inflammation remain mostly unclear, possibly attributable to the limited availability of non-malignant human astrocyte cell lines that serve as an *in vitro* model of normal human astrocytes. In the present study, we characterized the comprehensive profiles named "secretome" [3] of cytokines and chemokines derived from cultured normal human astrocytes, compared under resting and activated conditions by using a protein microarray.

## Materials and Methods

### Ethics statement

Fetal brain tissue was obtained from a 15 weeks human fetus and dissociated cells prepared as described previously [4,5]. Human tissue collected for research purpose was approved by the Chung-Ang University Ethics Committee on Human Subject (Certificate #09-0041). Pregnant women gave written informed consents for clinical procedure and research use of the embryonic tissue in accordance with the declaration of Helsinki.

### Human astrocytes in culture

The brain tissue isolated from a fetus of 15 weeks gestation, was dissociated into single cells by incubation with 0.25% trypsin in phosphate-buffered saline (PBS) for 30 min, as described previously [4,5]. Dissociated cells were suspended in the culture medium, composed of the Dulbecco's modified Eagle medium (DMEM) with high glucose (Invitrogen, Carlsbad, CA) supplemented with 10% fetal bovine serum (FBS) (Invitrogen) and 20  $\mu$ g/mL gentamicin (Sigma, St Louis, MO). Dissociated cells were plated at  $5 \times 10^7$  cells/T75 flask and were grown in an incubator with 5% CO<sub>2</sub> atmosphere. In primary brain cell cultures, all microglia freely floating in the medium were removed.

**Table 1.** Proteome profiler array of human cytokines/chemokines used in the present study.

| Location | Control                            | Expression ratio in stimulated astrocytes |
|----------|------------------------------------|-------------------------------------------|
| A3, A4   | Complement Component 5/5a (C5/CSa) | Up                                        |
| A5, A6   | CD40 Ligand (CD154)                | -                                         |
| A7, A8   | G-CSF (CSF $\beta$ , CSF-3)        | Up                                        |
| A9, A10  | GM-CSF (CSF $\alpha$ , CSF-2)      | Up                                        |
| A11, A12 | GRO $\alpha$ (CXCL1)               | Up                                        |
| A13, A14 | I-309 (CCL1)                       | -                                         |
| A15, A16 | sICAM-1 (CD54)                     | Up                                        |
| A17, A18 | IFN- $\gamma$ (Type II IFN)        | -                                         |
| B3, B4   | IL-1 $\alpha$ (IL-1F1)             | -                                         |
| B5, B6   | IL-1 $\beta$ (IL-1F2)              | Up                                        |
| B7, B8   | IL-1ra (IL-1F3)                    | Up                                        |
| B9, B10  | IL-2                               | -                                         |
| B11, B12 | IL-4                               | -                                         |
| B13, B14 | IL-5                               | -                                         |
| B15, B16 | IL-6                               | Up                                        |
| B17, B18 | IL-8 (CXCL8)                       | Up                                        |
| C3, C4   | IL-10                              | -                                         |
| C5, C6   | IL-12 p70                          | -                                         |
| C7, C8   | IL-13                              | -                                         |
| C9, C10  | IL-16 (LCF)                        | -                                         |
| C11, C12 | IL-17                              | -                                         |
| C13, C14 | IL-17E                             | -                                         |
| C15, C16 | IL-23                              | -                                         |
| C17, C18 | IL-27                              | -                                         |
| D3, D4   | IL-32                              | -                                         |
| D5, D6   | IP-10 (CXCL10)                     | Up                                        |
| D7, D8   | I-TAC (CXCL11)                     | -                                         |
| D9, D10  | MCP-1 (CCL2)                       | Down                                      |
| D11, D12 | MIF (GIF, DER6)                    | Down                                      |
| D13, D14 | MIP-1 $\alpha$ (CCL3)              | Up                                        |
| D15, D16 | MIP-1 $\beta$ (CCL4)               | -                                         |
| D17, D18 | Serpin E1 (PAI-1)                  | Up                                        |
| E3, E4   | RANTES (CCL5)                      | Up                                        |
| E5, E6   | SDF-1 (CXCL12)                     | -                                         |
| E7, E8   | TNF- $\alpha$ (TNFSF1A)            | Up                                        |
| E9, E10  | sTREM-1                            | -                                         |

doi:10.1371/journal.pone.0092325.t001

After replating the cultures for three to five times by treatment with trypsin, most of neurons and oligodendrocytes underwent cell death and detached off, while astrocytes were firmly attached onto the flask surface, resulting in enrichment of highly purified astrocytes.

### Immunocytochemistry

Human astrocytes cultured on poly-L-lysine-coated Aclar plastic coverslips (9 mm in diameter) were fixed in methanol for 10 min at  $-20^{\circ}\text{C}$ . The cells were incubated with primary antibodies specific for GFAP (1:1,000, rabbit; Millipore, Billerica, MA), a cell

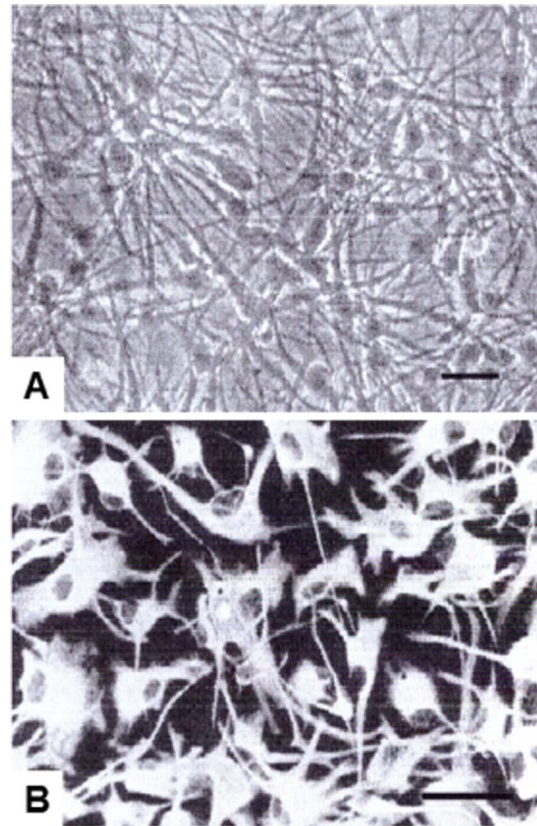

**Figure 1.** The purity of human astrocytes in culture exceeded 99% glial fibrillary acidic protein (GFAP) immunoreactivity-positive. Astrocytes shown are at the normal non-stimulated resting state. A: Phase contrast microscopy. B: Immunostaining with anti-GFAP antibody.

doi:10.1371/journal.pone.0092325.g001

type specific marker for astrocytes, or tubulin  $\beta$ III antibody (1:200, mouse, Millipore), a neuron specific marker, for 48 hrs at  $4^{\circ}\text{C}$  followed by Alexa Fluor594-conjugated anti-rabbit IgG or anti-mouse IgG for 1 hr at room temperature (RT). For immunostaining for cell type markers for oligodendrocytes and microglia, astrocytes on coverslips were fixed in 4% paraformaldehyde for 2 min, washed in PBS, incubated in anti-galactocerebroside

**Table 2.** Cytokines expressed in normal resting human astrocytes.

| Gene                 | Genbank   | Gene Name                                 |
|----------------------|-----------|-------------------------------------------|
| G-CSF                | NM_000759 | colony stimulating factor 3 (granulocyte) |
| GM-CSF               | NM_000758 | colony stimulating factor 2               |
| MCP-1 (CCL2)         | NM_002982 | chemokine (C-C motif) ligand 2            |
| GRO $\alpha$ (CXCL1) | NM_001511 | chemokine (C-X-C motif) ligand 1          |
| MIF                  | NM_002415 | macrophage migration inhibitory factor    |
| IL-6                 | NM_000600 | interleukin 6                             |
| IL-8 (CXCL8)         | NM_000584 | interleukin 8                             |
| Serpin E1            | NM_000602 | plasminogen activator inhibitor type 1    |

doi:10.1371/journal.pone.0092325.t002

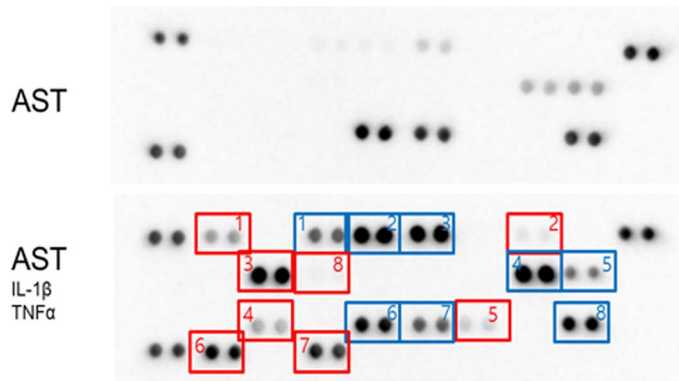

| Newly Expressed cytokines/chemokines |                                    | Changed expression |                               |
|--------------------------------------|------------------------------------|--------------------|-------------------------------|
| 1                                    | C5/C5a (Complement Component 5/5a) | 1                  | G-CSF (CSF $\beta$ , CSF-3)   |
| 2                                    | sICAM-1 (CD54)                     | 2                  | GM-CSF (CSF $\alpha$ , CSF-2) |
| 3                                    | IL-1 $\beta$ (IL-1F2)              | 3                  | GRO $\alpha$ (CXCL1)          |
| 4                                    | IP-10 (CXCL10)                     | 4                  | IL-6                          |
| 5                                    | MIP-1 $\alpha$ (CCL3)              | 5                  | IL-8 (CXCL8)                  |
| 6                                    | RANTES (CCL5)                      | 6                  | MCP-1 (CCL2)                  |
| 7                                    | TNF- $\alpha$ (TNFSF1A)            | 7                  | MIF (GIF, DER6)               |
| 8                                    | IL-1ra (IL-1F3)                    | 8                  | Serpin E1 (PAI-1)             |

**Figure 2. Proteome profiler array of human cytokines/chemokines.** The array is capable of detecting a panel of 36 cytokines, chemokines, and soluble mediators. Top panel shows expression of cytokines/chemokines in resting unstimulated human astrocytes, and middle panel shows expression of cytokines/chemokines in human astrocytes stimulated with IL-1 $\beta$  and TNF- $\alpha$ . Items circled in red are newly expressed cytokines in activated astrocytes and ones circled in blue are cytokines changed expression in activated astrocytes. In bottom panel, newly expressed cytokines and cytokines changed expression are listed separately.  
doi:10.1371/journal.pone.0092325.g002

antibody (1:4, mouse; Kim Lab), a oligodendrocyte cell type-specific marker, or anti-human CD68 antibody (1:200, mouse, Millipore), a microglial marker, for 48 hrs at 4°C, followed by Alexa Fluor 594-conjugated anti-mouse IgG for 1 hr at RT. Cultures processed for immunocytochemistry were examined under an Olympus laser confocal fluorescence microscope.

### Cytokine and chemokine profiling

Human astrocytes were incubated in culture medium with or without inclusion of a mixture of 10 ng/mL recombinant human IL-1 $\beta$  (Peprotech, Rocky Hill, NJ) and 10 ng/mL recombinant human TNF- $\alpha$  (Peprotech). At 24 hours after treatment, the conditioned media were harvested and processed for profiling of cytokines and chemokines on the human cytokine array panel A (R&D system, Minneapolis, MN), which is capable of detecting a panel of 36 cytokines, chemokines, and soluble mediators, such as complement 5/5a, CD40 ligand, G-CSF, GM-CSF, GRO $\alpha$ , I-309, sICAM-1, IFN- $\gamma$ , IL-1 $\alpha$ , IL-1 $\beta$ , IL-1ra, IL-2, IL-4, IL-5, IL-6, IL-8, IL-10, IL-12p70, IL-13, IL-16, IL-17, IL-17E, IL-23, IL-27, IL-32 $\alpha$ , IP-10, I-TAC, MCP-1, MIF, MIP-1 $\alpha$ , MIP-1 $\beta$ , Serpin E1, RANTES, SDF-1, TNF $\alpha$ , and sTREM-1 (Table 1). The array membranes were reacted with the mixture of conditioned media and the antibody cocktail for 18 hrs at 4°C. After several washing, they were briefly incubated with secondary antibodies conjugated with horseradish peroxidase (HRP). Then, the membranes were exposed to HRP substrate. The intensity of the reaction was quantified on the Da vinci imaging system (Seoul, Korea).

### Molecular network analysis

We imported Entrez Gene IDs corresponding to cytokine and chemokine genes into the Core Analysis tool of Ingenuity Pathways Analysis (IPA) (Ingenuity Systems; www.ingenuity.com). IPA is a commercial knowledgebase that contains information on approximately 3,000,000 biological and chemical interactions with definite scientific evidence. By uploading the list of Gene IDs, the network-generation algorithm identifies focused genes integrated in global molecular networks. IPA calculates the score p-value that reflects the statistical significance of association between the genes and the networks by Fisher's exact test. We considered p-value<0.05 as a significant association. The information on known NF- $\kappa$ B target genes was collected from web accessible databases constructed by Dr. Thomas Gilmore, Boston University (www.bu.edu/nf-kb/gene-resources/target-genes) and by Bonsai Bioinformatics, Laboratoire d'Informatique Fondamentale de Lille (LIFL), Université Lille 1 (bioinfo.lifl.fr/NF-KB), as described previously [6].

### Results

#### Cytokine and chemokine profiles of human astrocytes in culture

The purity of human astrocytes in culture exceeded 99% by GFAP labeling without any contamination of the cells expressing CD68 (microglia), galactocerebroside (oligodendrocytes) or tubulin  $\beta$ III (neurons) (Fig. 1). Non-stimulated resting astrocytes incubated

**Table 3.** Cytokines absent in normal resting human astrocytes.

| Gene                        | Genebank     | Gene name                                                  |
|-----------------------------|--------------|------------------------------------------------------------|
| CD40 Ligand                 | NM_000074    | CD40 ligand                                                |
| I-309 (CCL1)                | NM_002981    | chemokine (C-C motif) ligand 1                             |
| IFN- $\gamma$ (Type II IFN) | NM_000619    | interferon, gamma                                          |
| IL-1 $\alpha$ (IL-1F1)      | NM_000575    | interleukin 1, alpha                                       |
| IL-2                        | NM_000586    | interleukin 2                                              |
| IL-4                        | NM_000589    | interleukin 4                                              |
| IL-5                        | NM_000879    | interleukin 5 (colony-stimulating factor, eosinophil)      |
| IL-10                       | NM_000572    | interleukin 10                                             |
| IL-12 p70                   | NM_000882/   | interleukin 12A (natural killer cell stimulatory factor 1) |
| IL-13                       | NM_002188    | interleukin 13                                             |
| IL-16                       | NM_172217    | interleukin 16                                             |
| IL-17                       | NM_002190    | interleukin 17A                                            |
| IL-17E                      | NM_022789    | interleukin 25                                             |
| IL-23                       | NM_016584    | interleukin 23, alpha subunit p19                          |
| IL-27                       | NM_145659    | interleukin 27                                             |
| IL-32                       | NM_001012633 | interleukin 32                                             |
| I-TAC (CXCL11)              | NM_005409    | chemokine (C-X-C motif) ligand 11                          |
| MIP-1 $\beta$ (CCL4)        | NM_002984    | chemokine (C-C motif) ligand 4                             |
| SDF-1 (CXCL12)              | NM_199168    | chemokine (C-X-C motif) ligand 12                          |
| sTREM-1                     | NM_018643    | triggering receptor expressed on myeloid cells 1           |

doi:10.1371/journal.pone.0092325.t003

in the culture medium without addition of cytokines expressed 8 out of 36 cytokines and chemokines tested, such as G-CSF, GM-CSF, IL-6, GRO $\alpha$  (CXCL1), IL-8 (CXCL8), MCP-1 (CCL2), MIF and serpin E1 (Table 2, Fig. 2). Other cytokines and chemokines were undetectable in the conditioned media of non-stimulated astrocytes (Table 3). Following a 24 hr-exposure to a mixture of IL-1 $\beta$  and TNF- $\alpha$ , the expression levels of 6 cytokines, including G-CSF, GM-CSF, IL-6, GRO $\alpha$ , IL-8 and Serpin E1, were elevated substantially (Table 4, Figs. 2 and 3), whereas the levels of both MCP-1 and MIF showed a minor reduction (Table 5, Figs. 2 and 3). In astrocytes activated with IL-1 $\beta$ /TNF- $\alpha$  for 24 hrs, there was new induction of cytokines and chemokines including IL-1 $\beta$ , IL-1ra, TNF- $\alpha$ , IP-10 (CXCL10), MIP-1 $\alpha$  (CCL3), RANTES (CCL5), sICAM-1 (CD54) and complement component 5 (C5a) (Table 6, Figs. 2 and 3), suggesting an existence of the positive autoregulatory feedback loop for expression of IL-1 $\beta$  and TNF- $\alpha$ . Among them, upregulated expression of RANTES was the most prominent (Fig. 3B). By

database search on known NF- $\kappa$ B target genes, nearly all cytokines and chemokines produced by non-stimulated and activated astrocytes are direct targets of the transcription factor NF- $\kappa$ B, except for C5a, IL-1ra, and MIF, although the genes encoding C5a and MIF have NF- $\kappa$ B binding sites in the promoter regions by literature search on PubMed [7,8].

#### Molecular network of cytokine and chemokine secretome of human astrocytes

When the list of Entrez Gene IDs corresponding to 14 up-regulated and 2 down-regulated cytokines in IL-1 $\beta$ /TNF- $\alpha$ -activated human astrocytes (Tables 4 and 5, Figs. 2 and 3) were imported into IPA, we identified the molecular network defined by “Cell-to-Cell Signaling and Interaction, Hematological System Development and Function, Immune Cell Trafficking” as the most significant functional network relevant to the set of imported genes ( $p = 1.00E-13$ ) (Table 7, Fig. 4). The network defined by “Cellular Movement, Hematological System Development and

**Table 4.** Cytokines upregulated in human astrocytes following IL-1 $\beta$ /TNF $\alpha$  treatment.

| Gene                 | Fold  | Genbank   | Gene Name                                            |
|----------------------|-------|-----------|------------------------------------------------------|
| G-CSF                | 19.74 | NM_000759 | colony stimulating factor 3 (granulocyte)            |
| GM-CSF               | 43.25 | NM_000758 | colony stimulating factor 2 (granulocyte-macrophage) |
| GRO $\alpha$ (CXCL1) | 10.27 | NM_001511 | chemokine (C-X-C motif) ligand 1                     |
| IL-6                 | 6.09  | NM_000600 | interleukin 6                                        |
| IL-8 (CXCL8)         | 1.47  | NM_000584 | interleukin 8                                        |
| Serpin E1(PAI-1)     | 1.30  | NM_000602 | plasminogen activator inhibitor type 1               |

doi:10.1371/journal.pone.0092325.t004

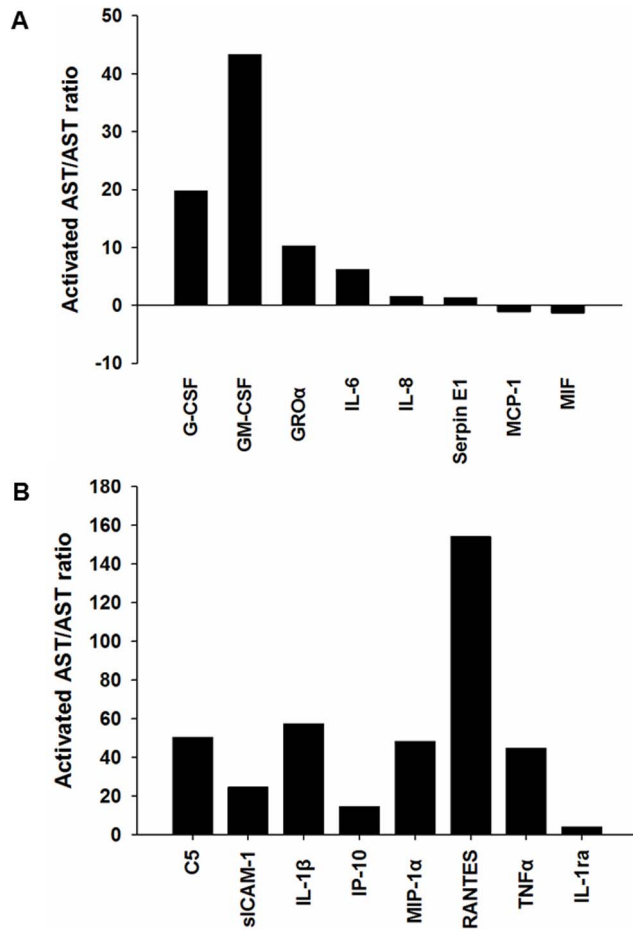

**Figure 3. Cytokines/chemokines changed their secretion levels in human astrocytes stimulated with IL-1 $\beta$  and TNF- $\alpha$ .** A: Forty five-fold increase in secretion of GM-CSF and twenty-fold increase in secretion of G-CSF are shown here. A minor reduction in expression of MCP-1 and MIF is also shown. B: Among the elevated levels of cytokines/chemokines in human astrocytes stimulated with IL-1 $\beta$  and TNF- $\alpha$ , upregulated expression of RANTES was the most prominent with more than 150-fold increase.  
doi:10.1371/journal.pone.0092325.g003

Function, Immune Cell Trafficking” ( $p = 1.00E-6$ ) was the second rank significant functional network (Table 7). IPA also indicated that nuclear factor NF- $\kappa$ B/RelA serves as an upstream regulator of the imported genes ( $p = 7.36E-24$ ), validating the results of database search on NF- $\kappa$ B target genes described above. In IPA analysis, up-regulated molecules, such as MIP-1 $\alpha$  (CCL3), RANTES (CCL5), GM-CSF, sICAM1, IL-1 $\beta$ , IL-6, IL-8 (CXCL8), and TNF- $\alpha$ , and a down-regulated molecule MCP-1 (CCL2), were categorized into NF- $\kappa$ B target genes located in the NF- $\kappa$ B signaling pathway (Fig. 4).

## Discussion

Due to the limited availability of human brain tissues, only a small number of studies have previously reported the cytokine

**Table 5. Cytokines downregulated in human astrocytes following IL-1 $\beta$ /TNF $\alpha$  treatment.**

| Gene         | Fold  | Genbank   | Gene Name                              |
|--------------|-------|-----------|----------------------------------------|
| MCP-1 (CCL2) | -1.04 | NM_002982 | chemokine (C-C motif) ligand 2         |
| MIF          | -1.28 | NM_002415 | macrophage migration inhibitory factor |

doi:10.1371/journal.pone.0092325.t005

production profiles of normal human astrocytes [9–11]. In the present study, we characterized the more comprehensive profile of cytokine and chemokine named “secretome” derived from non-stimulated resting and activated human astrocytes by using a protein microarray. We found that both non-stimulated and IL-1 $\beta$ /TNF $\alpha$ -activated astrocytes produce distinct sets of cytokines and chemokines, nearly all of which represent direct targets of transcription factor NF- $\kappa$ B. One exception is MCP-1 (CCL2), a direct target of NF- $\kappa$ B [12], was down-regulated in activated astrocytes following exposure to IL-1 $\beta$  and TNF- $\alpha$ . In contrast, a previous study has indicated that the activated adult human astrocytes in culture produced increased amounts of MCP-1 [11]. The discrepancy between our results and previous findings is attributable to a difference in maturation of cultured cells, i.e. fetal versus adult astrocytes employed. These results suggest that the NF- $\kappa$ B signaling pathway differentially regulates gene expression of cytokines and chemokines in human astrocytes under physiological and inflammatory environments.

NF- $\kappa$ B acts as a central regulator of innate and adaptive immune response, stress response, cell proliferation, and apoptosis [13]. The NF- $\kappa$ B family proteins consist of five members, such as RelA (p65), RelB, c-Rel, NF- $\kappa$ B1 (p105), and NF- $\kappa$ B2 (p100). The latter two are processed proteolytically into p50 and p52, respectively. The NF- $\kappa$ B family proteins constitute either homodimers or heterodimers, except for RelB that exclusively forms heterodimers. The NF- $\kappa$ B dimers interact with consensus DNA sequences termed the  $\kappa$ B site located on promoters to activate or repress transcription of target genes. Only p65 and c-Rel act as a potent transcriptional activator, whereas p50 and p52 homodimers generally repress transcription, leading to differential regulation of gene expression of NF- $\kappa$ B targets [14]. We found that MCP-1 (CCL2), a target of NF- $\kappa$ B, is down-regulated in NF- $\kappa$ B-activated human astrocytes. Importantly, NF- $\kappa$ B target genes often activate NF- $\kappa$ B itself, providing a positive regulatory loop that amplifies and perpetuates inflammatory responses [15]. IL-1  $\beta$  and TNF- $\alpha$  are the prototypes of NF- $\kappa$ B activators for the canonical NF- $\kappa$ B signaling pathway. We found that non-stimulated human astrocytes do not constitutively produce IL-1 $\beta$  or TNF- $\alpha$ , while activated human astrocytes could produce both, as described previously [9,11]. In contrast, a previous study has shown that IL-1 $\beta$  is undetectable at both mRNA and protein levels in non-stimulated or cytokine-stimulated cultured human astrocytes [10]. A different study from the same group showed that IL-8 (CXCL8) is undetectable in non-stimulated human fetal astrocytes in culture [16], being inconsistent with our results. In our study, non-stimulated astrocytes expressed a panel of NF- $\kappa$ B targets, such as G-CSF, GM-CSF, IL-6, GRO $\alpha$  (CXCL1), IL-8 (CXCL8), MCP-1 (CCL2), MIF and serpin E1, suggesting that the NF- $\kappa$ B signaling pathway is constitutively active to a certain extent in normal human astrocytes in culture. Notably, GM-CSF serves as an anti-apoptotic and neurotrophic factor [17].

**Table 6.** Cytokines newly induced in human astrocytes following IL-1 $\beta$ /TNF $\alpha$  treatment.

| Gene                  | Fold   | Genbank   | Gene Name                                         |
|-----------------------|--------|-----------|---------------------------------------------------|
| IL-1 $\beta$          | 57.17  | NM_000576 | interleukin 1, beta                               |
| IL-1 $\alpha$         | 3.72   | NM_002182 | interleukin 1 receptor accessory protein          |
| TNF $\alpha$          | 44.75  | NM_000594 | tumor necrosis factor (TNF superfamily, member 2) |
| sICAM-1               | 24.38  | NM_000201 | intercellular adhesion molecule 1 (CD54)          |
| C5                    | 50.25  | NM_001735 | complement component 5                            |
| IP-10 (CXCL10)        | 14.27  | NM_001565 | chemokine (C-X-C motif) ligand 10                 |
| MIP-1 $\alpha$ (CCL3) | 48.05  | NM_002983 | chemokine (C-C motif) ligand 3                    |
| RANTES (CCL5)         | 154.13 | NM_002985 | chemokine (C-C motif) ligand 5                    |

doi:10.1371/journal.pone.0092325.t006

Chemokines constitutes a group of structurally related proteins that play a pivotal role in regulation of immune cell trafficking involved in inflammatory and immunoregulatory processes in the CNS [18]. In the present study, molecular network of cytokine and chemokine secretome of activated human astrocytes strongly supported the view that these soluble factors are critically involved in regulation of the cellular interaction and trafficking of immune cells. Various chemokine receptors, such as CCR2 with the ligand MCP-1 and CXCL2 with multiple ligands, such as Gro $\alpha$ , Gro $\beta$  and IL-8, are up-regulated in brain lesions of trauma, ischemia, and multiple sclerosis (MS) [19]. MIP-1 belongs to a family of C-C chemokines with a potent chemotactic activity for neutrophils and other leukocytes, composed of two members MIP-1 $\alpha$  (CCL3) and MIP-1 $\beta$  (CCL4), both of which exhibit very similar but not identical proinflammatory properties through binding differentially to the receptors CCR1, CCR4 or CCR5. The upregulated expression of MIP-1 $\alpha$  and MIP-1 $\beta$  was identified in acute MS lesions [20]. However, we identified MIP-1 $\alpha$  (CCL3) but did not detect the expression of MIP-1 $\beta$  (CCL4) in non-stimulated or activated human astrocytes in culture, suggesting that the gene regulatory mechanism is different between MIP-1 $\alpha$  and MIP-1 $\beta$ , although both are directly regulated by NF- $\kappa$ B.

RANTES is a member of C-C chemokines involved in the pathogenesis of MS and HIV-1 encephalitis by binding to the

receptors CCR1, CCR3 or CCR5 [21,22]. A previous study has shown that fetal human astrocytes upon activation by IL-1 $\beta$  secretes a large amount of RANTES (CCL5) protein [23], supporting our observation that RANTES is the most prominently up-regulated chemokine in activated human astrocytes in culture. Importantly, RANTES plays a neuroprotective role in ischemic brain injury [24]. The expression of IP-10 (CXCL10), secreted by monocytes, endothelial cells, and fibroblasts in response to IFN- $\gamma$ , shows a chemotactic activity for T cells, NK cells, dendritic cells and monocytes/macrophages through binding to the receptor CXCR3. We found that IP-10 production is greatly enhanced in activated human astrocytes in culture. Notably, the expression of IP-10 and CXCR3 is up-regulated in the brains of AD, where CXCR3 is expressed constitutively on neurons, while IP-10 expression is enhanced in a subset of reactive astrocytes surrounding senile plaques [25].

In conclusion, the comprehensive cytokine and chemokine secretome of activated human astrocytes, closely linked to NF- $\kappa$ B activation, suggested that astrocyte-derived cytokines and chemokines play a central role in proinflammatory (neurotoxic) and immunoregulatory (neuroprotective) responses in the CNS.

**Table 7.** Top 3 molecular networks of cytokine and chemokine secretome in human astrocytes.

| Rank | Functional Networks                                                                                            | Focused Molecules                                                                                                                                                                                                                                                                                                                                                                                                       | p-Value  |
|------|----------------------------------------------------------------------------------------------------------------|-------------------------------------------------------------------------------------------------------------------------------------------------------------------------------------------------------------------------------------------------------------------------------------------------------------------------------------------------------------------------------------------------------------------------|----------|
| 1    | Cell-To-Cell Signaling and Interaction, Hematological System Development and Function, Immune Cell Trafficking | <b>CCL3, CCL5, CSF2, CSF3, CXCL1</b> , chitinase, Collagen Alpha1, Collagen type II, Cpla2, elastase, Eotaxin, ERK1/2, ETS, Fc $\gamma$ 1, Fc $\gamma$ 2, Ferritin, Fibrin, HLA-DR, IL-17f dimer, <b>IL-1R</b> , IL17a dimer, IL17R, IL1RAP, Il8r, IRAK, Lfa-1, Lymphotoxin, lymphotoxin-alpha1-beta2, Nf $\kappa$ B-RelA, Nf $\kappa$ B1-RelA, Nr1h, PI3K (family), Rxr, Scavenger receptor class A, VitaminD3-VDR-RXR | 1.00E-13 |
| 2    | Cellular Movement, Hematological System Development and Function, Immune Cell Trafficking                      | 26 s Proteasome, Akt, AMPK, BCR (complex), calpain, <b>CCL2</b> , Cdk, Collagen type IV, Cyclin A, Cyclin E, cyclooxygenase, Fibrinogen, gelatinase, <b>GM-CSF</b> , Growth hormone, HDL, Ige, Ikb, JINK1/2, Laminin, LDL, <b>MIF</b> , N-cor, NADPH oxidase, Nos, PDGF (complex), PDGF BB, PRKAA, Ptk, Rb, Rock, <b>Serpine1</b> , Smad, Sphk, TGF-beta                                                                | 1.00E-06 |
| 3    | Infectious Disease, Cell-To-Cell Signaling and Interaction, Cellular Growth and Proliferation                  | Calcineurin protein(s), CD3, collagen, CYP, estrogen receptor, Hdac, hemoglobin, Histone h4, Hsp27, Hsp70, Hsp90, Icam, Iga, IgG1, Igm, <b>IL-6</b> , <b>IL-8</b> , Immunoglobulin, Interferon alpha, Ldh, Mek, Nfat (family), Notch, P38 MAPK, p70 S6k, Pro-inflammatory Cytokine, Rap1, Rsk, Serine Protease, Sod, SRC (family), STAT5a/b, <b>TNF</b> , TSH, U1 snRNP                                                 | 1.00E-05 |

Functional networks were studied by importing Entrez Gene IDs of 14 up-regulated and 2 down-regulated cytokines in IL-1 $\beta$ /TNF- $\alpha$ -activated human astrocytes into the core analysis tool of IPA. They are listed with functional networks, focused molecules, and p-value of the Fisher's exact test. The first rank network is illustrated in Fig. 4. doi:10.1371/journal.pone.0092325.t007

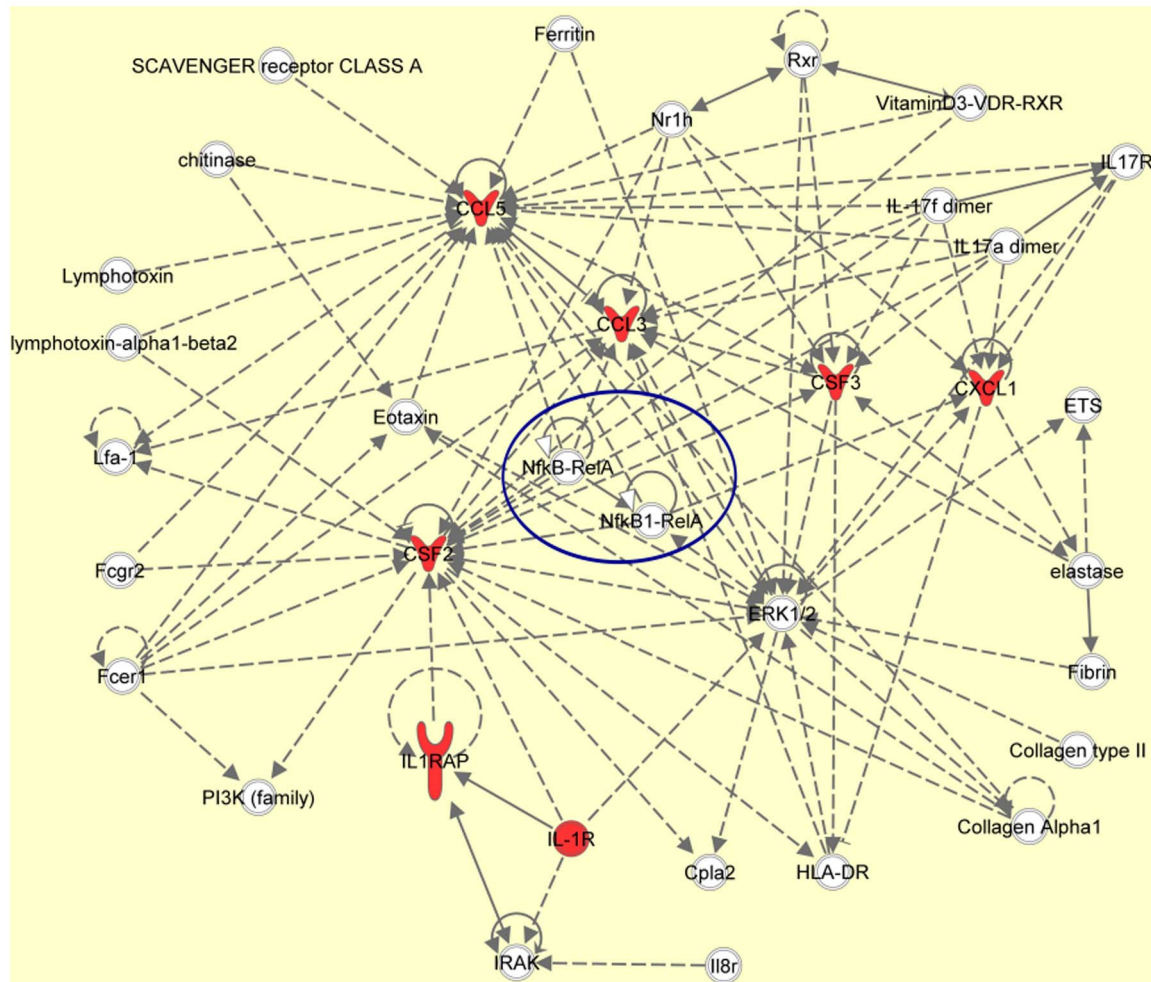

**Figure 4. Molecular network showing cytokine and chemokine secretomes of human astrocytes.** Entrez Gene IDs corresponding to 14 upregulated and 2 downregulated cytokines in IL-1 $\beta$ /TNF- $\alpha$ -activated human astrocytes were imported into the Ingenuity Pathways Analysis (IPA). The most significant molecular network relevant to the imported genes (red arrows) is shown. NF- $\kappa$ B is highlighted by blue circle. CCL5 (RANTES), CCL3 (MIP-1 $\alpha$ ), CXCL1 (GRO $\alpha$ ), CSF2 (GM-CSF), CSF3 (G-CSF), IL1R and IL1RAP are indicated by red. doi:10.1371/journal.pone.0092325.g004

## Acknowledgments

This study was supported by the Korea Healthcare Technology R&D Project (A12021412010000100), and Canadian Myelin Research Initiative.

## References

- Barres BA (2008) The mystery and magic of glia: a perspective on their roles in health and disease. *Neuron* 60: 430–440.
- Sofroniew MV, Vinters HV (2010) Astrocytes: biology and pathology. *Acta Neuropathol* 119: 7–35.
- Skahnikova H, Motlik J, Gadher SJ, Kovarova H (2011) Mapping of the secretome of primary isolates of mammalian cells, stem cells and derived cell lines. *Proteomics* 11: 691–708.
- Kim SU, Moretto G, Lee V, Yu RK (1986) Neuroimmunology of gangliosides in human neurons and glial cells in culture. *J Neurosci Res* 15: 303–321.
- Satoh J, Kim SU (1995) Cytokines and growth factors induce HSP27 phosphorylation in human astrocytes. *J Neuropathol Exp Neurol* 54: 504–512.
- Satoh J (2013) Molecular network of ChIP-Seq-based NF- $\kappa$ B p65 target genes involves diverse immune functions relevant to the immunopathogenesis of multiple sclerosis. *Mult Scler Relat Disord* 3: 94–106.
- Carney DF, Haviland DL, Noack D, Wetsel RA, Vik DP, et al. (1991) Structural aspects of the human C5 gene. Intron/exon organization, 5'-flanking region features, and characterization of two truncated cDNA clones. *J Biol Chem* 266: 18786–18791.
- Chen L, Yang G, Zhang X, Wu J, Gu Q, et al. (2009) Induction of MIF expression by oxidized LDL via activation of NF- $\kappa$ B in vascular smooth muscle cells. *Atherosclerosis* 207: 428–433.
- Aloisi F, Carè A, Borsellino G, Gallo P, Rosa S, et al. (1992) Production of hemolympopoietic cytokines (IL-6, IL-8, colony-stimulating factors) by normal human astrocytes in response to IL-1 $\beta$  and tumor necrosis factor- $\alpha$ . *J Immunol* 149: 2358–2366.
- Lee SC, Liu W, Dickson DW, Brosnan CF, Berman JW (1993) Cytokine production by human fetal microglia and astrocytes. Differential induction by lipopolysaccharide and IL-1 $\beta$ . *J Immunol* 150: 2659–2667.
- Meeuwsen S, Persoon-Deen C, Bilsbi M, Ravid R, van Noort JM (2003) Cytokine, chemokine and growth factor gene profiling of cultured human astrocytes after exposure to proinflammatory stimuli. *Glia* 43: 243–253.
- Ueda A, Okuda K, Ohno S, Shirai A, Igarashi T, et al. (1994) NF- $\kappa$ B and Sp1 regulate transcription of the human monocyte chemoattractant protein-1 gene. *J Immunol* 153: 2052–2063.
- Gillmore TD (2006) Introduction to NF- $\kappa$ B: players, pathways, perspectives. *Oncogene* 25: 6680–6684.

## Author Contributions

Conceived and designed the experiments: HJL SUK. Performed the experiments: SSC HJL. Analyzed the data: SSC HJL JIS SUK. Contributed reagents/materials/analysis tools: IL JIS. Wrote the paper: SSC HJL JIS SUK.

14. Rothwarf DM, Karin M (1999) The NF- $\kappa$ B activation pathway: a paradigm in information transfer from membrane to nucleus. *Sci STKE* 1999: RE1.
15. Barnes PJ, Karin M (1997) Nuclear factor- $\kappa$ B. A pivotal transcription factor in chronic inflammatory diseases. *N Engl J Med* 336: 1066–1071.
16. Hua LL, Lee SC (2000) Distinct patterns of stimulus-inducible chemokine mRNA accumulation in human fetal astrocytes and microglia. *Glia* 30: 74–81.
17. Schäbitz WR, Krüger C, Pitzer C, Weber D, Laage R, et al. (2008) A neuroprotective function for the hematopoietic protein granulocyte-macrophage colony stimulating factor (GM-CSF). *J Cereb Blood Flow Metab* 28: 29–43.
18. Takeshita Y, Ransohoff RM (2012) Inflammatory cell trafficking across the blood-brain barrier: chemokine regulation and in vitro models. *Immunol Rev* 248: 228–239.
19. Bajetto A, Bonavia R, Barbero S, Schettini G (2002) Characterization of chemokines and their receptors in the central nervous system: physiopathological implications. *J Neurochem* 82: 1311–1329.
20. Simpson JE, Newcombe J, Cuzner ML, Woodroffe MN (1998) Expression of monocyte chemoattractant protein-1 and other  $\beta$ -chemokines by resident glia and inflammatory cells in multiple sclerosis lesions. *J Neuroimmunol* 84: 238–249.
21. Sørensen TL, Tani M, Jensen J, Pierce V, Lucchinetti C, et al. (1999) Expression of specific chemokines and chemokine receptors in the central nervous system of multiple sclerosis patients. *J Clin Invest* 103: 807–815.
22. Kitai R, Zhao ML, Zhang N, Hua LL, Lee SC (2000) Role of MIP-1 $\beta$  and RANTES in HIV-1 infection of microglia: inhibition of infection and induction by IFN- $\beta$ . *J Neuroimmunol* 110: 230–239.
23. Kim MO, Suh HS, Brosnan CF, Lee SC (2004) Regulation of RANTES/CCL5 expression in human astrocytes by interleukin-1 and interferon- $\beta$ . *J Neurochem* 90:297–308.
24. Tokami H, Ago T, Sugimori H, Kuroda J, Awano H (2013) REBIOS Investigators. RANTES has a potential to play a neuroprotective role in an autocrine/paracrine manner after ischemic stroke. *Brain Res* 1517: 122–132.
25. Xia MQ, Bacskaï BJ, Knowles RB, Qin SX, Hyman BT (2000) Expression of the chemokine receptor CXCR3 on neurons and the elevated expression of its ligand IP-10 in reactive astrocytes: in vitro ERK1/2 activation and role in Alzheimer's disease. *J Neuroimmunol* 108: 227–235.
